# Supplementary material for: Structural investigation and compression of a co-crystal of indomethacin and saccharin
Source: Royal Society of Chemistry journal article supplement (doi:10.1039/c9ce00838a), 2019-01-01
Supplement: c9ce00838a1.pdf [file c9ce00838a1.pdf]

Supplementary Information:

**Structural investigation and compression of a co-crystal of indomethacin and saccharin.**

Lauren E. Connor,<sup>\*ab</sup> Antony D. Vassileiou,<sup>d</sup> Gavin W. Halbert,<sup>a,c</sup> Blair F. Johnston<sup>a, c-e</sup> and Iain D.H. Oswald<sup>\*a</sup>

<sup>a</sup>Strathclyde Institute of Pharmacy and Biomedical Sciences, University of Strathclyde, 161 Cathedral Street, Glasgow, G4 0RE, U.K.

<sup>b</sup>Collaborative International Research Programme: University of Strathclyde and Nanyang Technological University, Singapore, Technology Innovation Centre, 99 George Street, Glasgow, G1 1RD, U.K.

<sup>c</sup>EPSRC Centre for Innovative Manufacturing in Continuous Manufacturing and Crystallisation, University of Strathclyde, Technology Innovation Centre, 99 George Street, Glasgow, G1 1RD, U.K.

<sup>d</sup>EPSRC ARTICULAR, University of Strathclyde, Technology Innovation Centre, 99 George Street, Glasgow, G1 1RD, U.K.

<sup>e</sup>National Physical Laboratory, Hampton Road, Teddington, Middlesex, TW11 0LW

Table S1: Experimental details

For all structures:  $C_{19}H_{16}ClNO_4 \cdot C_7H_5NO_3S$ ,  $M_r = 540.96$ , triclinic,  $P\bar{1}$ ,  $Z = 2$ . Experiments were carried out with Mo  $K\alpha$  radiation using a Bruker SMART APEX2 area detector. H-atom parameters were constrained.

|                                                                                           | Ambient pressure,<br>297K                                                                                                                                                                                                                                                          | 0.55 GPa, 297 K                                                                                                                                                                                                                                                                  | 1.66 GPa, 297 K                                                                                                                                                                                                                                                                  |
|-------------------------------------------------------------------------------------------|------------------------------------------------------------------------------------------------------------------------------------------------------------------------------------------------------------------------------------------------------------------------------------|----------------------------------------------------------------------------------------------------------------------------------------------------------------------------------------------------------------------------------------------------------------------------------|----------------------------------------------------------------------------------------------------------------------------------------------------------------------------------------------------------------------------------------------------------------------------------|
| $a, b, c$ (Å)                                                                             | 7.1314 (2), 10.4809 (2),<br>16.7109 (4)                                                                                                                                                                                                                                            | 7.0133 (6), 10.155 (2),<br>16.607 (3)                                                                                                                                                                                                                                            | 6.9301 (4), 9.9420 (7),<br>16.514 (3)                                                                                                                                                                                                                                            |
| $\alpha, \beta, \gamma$ (°)                                                               | 80.5779 (12), 86.4941<br>(12), 79.2821 (12)                                                                                                                                                                                                                                        | 79.683 (14), 85.829<br>(11), 79.844 (14)                                                                                                                                                                                                                                         | 79.013 (11), 85.441<br>(10), 80.339 (5)                                                                                                                                                                                                                                          |
| $V$ (Å <sup>3</sup> )                                                                     | 1210.08 (5)                                                                                                                                                                                                                                                                        | 1144.3 (3)                                                                                                                                                                                                                                                                       | 1099.8 (2)                                                                                                                                                                                                                                                                       |
| $\mu$ (mm <sup>-1</sup> )                                                                 | 0.30                                                                                                                                                                                                                                                                               | 0.31                                                                                                                                                                                                                                                                             | 0.33                                                                                                                                                                                                                                                                             |
| Crystal size (mm)                                                                         | 0.25 × 0.30 × 0.05                                                                                                                                                                                                                                                                 | 0.25 × 0.05 × 0.04                                                                                                                                                                                                                                                               | 0.24 × 0.04 × 0.04                                                                                                                                                                                                                                                               |
| Absorption<br>correction                                                                  | Multi-scan<br>SADABS-2016/2<br>(Bruker,2016/2) was<br>used for absorption<br>correction. $wR2(int)$<br>was 0.0807 before and<br>0.0443 after correction.<br>The Ratio of minimum<br>to maximum<br>transmission is 0.9327.<br>The $\lambda/2$ correction<br>factor is Not present.' | Multi-scan<br>SADABS2016/2<br>(Bruker,2016/2) was<br>used for absorption<br>correction. $wR2(int)$<br>was 0.1025 before and<br>0.0509 after correction.<br>The Ratio of minimum<br>to maximum<br>transmission is 0.8711.<br>The $\lambda/2$ correction<br>factor is Not present. | Multi-scan<br>SADABS2016/2<br>(Bruker,2016/2) was<br>used for absorption<br>correction. $wR2(int)$<br>was 0.0861 before and<br>0.0545 after correction.<br>The Ratio of minimum<br>to maximum<br>transmission is 0.7871.<br>The $\lambda/2$ correction<br>factor is Not present. |
| $T_{min}, T_{max}$                                                                        | 0.696, 0.746                                                                                                                                                                                                                                                                       | 0.649, 0.745                                                                                                                                                                                                                                                                     | 0.586, 0.745                                                                                                                                                                                                                                                                     |
| No. of measured,<br>independent and<br>observed [ $I > 2.0\sigma$<br>( $I$ )] reflections | 26677, 7292, 4554                                                                                                                                                                                                                                                                  | 3840, 1015, 682                                                                                                                                                                                                                                                                  | 5514, 1044, 761                                                                                                                                                                                                                                                                  |
| $R_{int}$                                                                                 | 0.034                                                                                                                                                                                                                                                                              | 0.073                                                                                                                                                                                                                                                                            | 0.081                                                                                                                                                                                                                                                                            |
| $\theta_{max}$ (°)                                                                        | 30.5                                                                                                                                                                                                                                                                               | 23.2                                                                                                                                                                                                                                                                             | 23.3                                                                                                                                                                                                                                                                             |
| $(\sin \theta/\lambda)_{max}$ (Å <sup>-1</sup> )                                          | 0.714                                                                                                                                                                                                                                                                              | 0.555                                                                                                                                                                                                                                                                            | 0.556                                                                                                                                                                                                                                                                            |
| $R[F^2 > 2\sigma(F^2)],$<br>$wR(F^2), S$                                                  | 0.047, 0.125, 1.06                                                                                                                                                                                                                                                                 | 0.066, 0.166, 1.06                                                                                                                                                                                                                                                               | 0.059, 0.149, 1.09                                                                                                                                                                                                                                                               |
| No. of reflections                                                                        | 7292                                                                                                                                                                                                                                                                               | 1015                                                                                                                                                                                                                                                                             | 1044                                                                                                                                                                                                                                                                             |
| No. of parameters                                                                         | 337                                                                                                                                                                                                                                                                                | 126                                                                                                                                                                                                                                                                              | 126                                                                                                                                                                                                                                                                              |
| No. of restraints                                                                         | 0                                                                                                                                                                                                                                                                                  | 20                                                                                                                                                                                                                                                                               | 24                                                                                                                                                                                                                                                                               |
| $\Delta\rho_{max}, \Delta\rho_{min}$ (e Å <sup>-3</sup> )                                 | 0.35, -0.55                                                                                                                                                                                                                                                                        | 0.28, -0.29                                                                                                                                                                                                                                                                      | 0.25, -0.22                                                                                                                                                                                                                                                                      |

Computer programs: SAINT v8.37A(Bruker AXS Inc., 2014) SHELXT(Sheldrick & IUCr, 2015) XL (Sheldrick, 2015) and Olex2(Dolomanov *et al.*, 2009)

Table S1 contd.: Experimental details

For all structures:  $C_{19}H_{16}ClNO_4 \cdot C_7H_5NO_3S$ ,  $M_r = 540.96$ , triclinic,  $P\bar{1}$ ,  $Z = 2$ . Experiments were carried out with Mo  $K\alpha$  radiation using a Bruker SMART APEX2 area detector. H-atom parameters were constrained.

|                                                                                       |                                                                                                                                                                                                                                                                   |                                                                                                                                                                                                                                                                   |
|---------------------------------------------------------------------------------------|-------------------------------------------------------------------------------------------------------------------------------------------------------------------------------------------------------------------------------------------------------------------|-------------------------------------------------------------------------------------------------------------------------------------------------------------------------------------------------------------------------------------------------------------------|
|                                                                                       | 3.33 GPa, 297K                                                                                                                                                                                                                                                    | 4.06 GPa, 297 K                                                                                                                                                                                                                                                   |
| $a, b, c$ (Å)                                                                         | 6.7888 (3), 9.6045 (11),<br>16.3703 (16)                                                                                                                                                                                                                          | 7.0133 (6), 10.155 (2),<br>16.607 (3)                                                                                                                                                                                                                             |
| $\alpha, \beta, \gamma$ (°)                                                           | 77.764 (8), 84.858 (6),<br>81.297 (8)                                                                                                                                                                                                                             | 79.683 (14), 85.829 (11),<br>79.844 (14)                                                                                                                                                                                                                          |
| $V$ (Å <sup>3</sup> )                                                                 | 1029.30 (17)                                                                                                                                                                                                                                                      | 1144.3 (3)                                                                                                                                                                                                                                                        |
| $\mu$ (mm <sup>-1</sup> )                                                             | 0.35                                                                                                                                                                                                                                                              | 0.31                                                                                                                                                                                                                                                              |
| Crystal size (mm)                                                                     | 0.25 × 0.05 × 0.04                                                                                                                                                                                                                                                | 0.25 × 0.05 × 0.04                                                                                                                                                                                                                                                |
| Absorption correction                                                                 | Multi-scan<br>SADABS2014/5<br>(Bruker, 2014/5) was used<br>for absorption correction.<br>wR2(int) was 0.0729 before<br>and 0.0488 after correction.<br>The Ratio of minimum to<br>maximum transmission is<br>0.9098. The l/2 correction<br>factor is Not present. | Multi-scan<br>SADABS2016/2<br>(Bruker, 2016/2) was used<br>for absorption correction.<br>wR2(int) was 0.1025 before<br>and 0.0509 after correction.<br>The Ratio of minimum to<br>maximum transmission is<br>0.8711. The l/2 correction<br>factor is Not present. |
| $T_{\min}, T_{\max}$                                                                  | 0.678, 0.745                                                                                                                                                                                                                                                      | 0.649, 0.745                                                                                                                                                                                                                                                      |
| No. of measured,<br>independent and<br>observed [ $I > 2.0\sigma(I)$ ]<br>reflections | 4793, 941, 747                                                                                                                                                                                                                                                    | 3840, 1015, 682                                                                                                                                                                                                                                                   |
| $R_{\text{int}}$                                                                      | 0.050                                                                                                                                                                                                                                                             | 0.073                                                                                                                                                                                                                                                             |
| $\theta_{\max}$ (°)                                                                   | 23.3                                                                                                                                                                                                                                                              | 23.2                                                                                                                                                                                                                                                              |
| $(\sin \theta/\lambda)_{\max}$ (Å <sup>-1</sup> )                                     | 0.557                                                                                                                                                                                                                                                             | 0.555                                                                                                                                                                                                                                                             |
| $R[F^2 > 2\sigma(F^2)], wR(F^2), S$                                                   | 0.064, 0.163, 1.09                                                                                                                                                                                                                                                | 0.066, 0.166, 1.06                                                                                                                                                                                                                                                |
| No. of reflections                                                                    | 941                                                                                                                                                                                                                                                               | 1015                                                                                                                                                                                                                                                              |
| No. of parameters                                                                     | 126                                                                                                                                                                                                                                                               | 126                                                                                                                                                                                                                                                               |
| No. of restraints                                                                     | 24                                                                                                                                                                                                                                                                | 20                                                                                                                                                                                                                                                                |
| $\Delta\rho_{\max}, \Delta\rho_{\min}$ (e Å <sup>-3</sup> )                           | 0.27, -0.24                                                                                                                                                                                                                                                       | 0.28, -0.29                                                                                                                                                                                                                                                       |

Computer programs: SAINT v8.37A (Bruker AXS Inc., 2014) SHELXT (Sheldrick & IUCr, 2015) XL (Sheldrick, 2015) and Olex2 (Dolomanov *et al.*, 2009)

Table S1 contd.: Experimental details

For all structures:  $C_{19}H_{16}ClNO_4 \cdot C_7H_5NO_3S$ ,  $M_r = 540.96$ , triclinic,  $P\bar{1}$ ,  $Z = 2$ . Experiments were carried out with Mo  $K\alpha$  radiation using a Bruker SMART APEX2 area detector. H-atom parameters were constrained.

|                                                                                       | 4.34 GPa, 297K                                                                                                                                                                                                                                                              | 5.06 GPa, 297 K                                                                                                                                                                                                                                                             |
|---------------------------------------------------------------------------------------|-----------------------------------------------------------------------------------------------------------------------------------------------------------------------------------------------------------------------------------------------------------------------------|-----------------------------------------------------------------------------------------------------------------------------------------------------------------------------------------------------------------------------------------------------------------------------|
| $a, b, c$ (Å)                                                                         | 6.7109 (4), 9.4367 (12),<br>16.2988 (17)                                                                                                                                                                                                                                    | 6.6623 (3), 9.3453 (11),<br>16.2637 (15)                                                                                                                                                                                                                                    |
| $\alpha, \beta, \gamma$ (°)                                                           | 77.132 (9), 84.534 (7),<br>81.962 (9)                                                                                                                                                                                                                                       | 76.764 (8), 84.331 (6),<br>82.375 (8)                                                                                                                                                                                                                                       |
| $V$ (Å <sup>3</sup> )                                                                 | 994.17 (18)                                                                                                                                                                                                                                                                 | 974.52 (16)                                                                                                                                                                                                                                                                 |
| $\mu$ (mm <sup>-1</sup> )                                                             | 0.36                                                                                                                                                                                                                                                                        | 0.37                                                                                                                                                                                                                                                                        |
| Crystal size (mm)                                                                     | 0.25 × 0.05 × 0.04                                                                                                                                                                                                                                                          | 0.25 × 0.05 × 0.04                                                                                                                                                                                                                                                          |
| Absorption correction                                                                 | Multi-scan<br><i>SADABS2014/5</i><br>(Bruker,2014/5) was used<br>for absorption correction.<br>$wR2(int)$ was 0.0702 before<br>and 0.0505 after correction.<br>The Ratio of minimum to<br>maximum transmission is<br>0.9046. The $I/2$ correction<br>factor is Not present. | Multi-scan<br><i>SADABS2016/2</i><br>(Bruker,2016/2) was used<br>for absorption correction.<br>$wR2(int)$ was 0.0674 before<br>and 0.0484 after correction.<br>The Ratio of minimum to<br>maximum transmission is<br>0.8882. The $I/2$ correction<br>factor is Not present. |
| $T_{min}, T_{max}$                                                                    | 0.674, 0.745                                                                                                                                                                                                                                                                | 0.662, 0.745                                                                                                                                                                                                                                                                |
| No. of measured,<br>independent and<br>observed [ $I > 2.0\sigma(I)$ ]<br>reflections | 4363, 898, 715                                                                                                                                                                                                                                                              | 4517, 894, 694                                                                                                                                                                                                                                                              |
| $R_{int}$                                                                             | 0.050                                                                                                                                                                                                                                                                       | 0.053                                                                                                                                                                                                                                                                       |
| $\theta_{max}$ (°)                                                                    | 23.2                                                                                                                                                                                                                                                                        | 23.4                                                                                                                                                                                                                                                                        |
| $(\sin \theta/\lambda)_{max}$ (Å <sup>-1</sup> )                                      | 0.555                                                                                                                                                                                                                                                                       | 0.559                                                                                                                                                                                                                                                                       |
| $R[F^2 > 2\sigma(F^2)], wR(F^2), S$                                                   | 0.065, 0.153, 1.05                                                                                                                                                                                                                                                          | 0.067, 0.185, 1.08                                                                                                                                                                                                                                                          |
| No. of reflections                                                                    | 898                                                                                                                                                                                                                                                                         | 894                                                                                                                                                                                                                                                                         |
| No. of parameters                                                                     | 126                                                                                                                                                                                                                                                                         | 126                                                                                                                                                                                                                                                                         |
| No. of restraints                                                                     | 24                                                                                                                                                                                                                                                                          | 24                                                                                                                                                                                                                                                                          |
| $\Delta\rho_{max}, \Delta\rho_{min}$ (e Å <sup>-3</sup> )                             | 0.33, -0.25                                                                                                                                                                                                                                                                 | 0.33, -0.33                                                                                                                                                                                                                                                                 |

Computer programs: *SAINT* v8.37A(Bruker AXS Inc., 2014) *SHELXT*(Sheldrick & IUCr, 2015) *XL* (Sheldrick, 2015) and *Olex2*(Dolomanov *et al.*, 2009)

Table S2: Selected hydrogen-bond parameters of INSA at pressure

| $D-H\cdots A$                         | $D-H$ (Å) | $H\cdots A$ (Å) | $D\cdots A$ (Å) | $D-H\cdots A$ (°) |
|---------------------------------------|-----------|-----------------|-----------------|-------------------|
| <b>Ambient Pressure</b>               |           |                 |                 |                   |
| O16—H161 $\cdots$ O17 <sup>(i)</sup>  | 0.84      | 1.84            | 2.6803(18)      | 176.2             |
| N26—H261 $\cdots$ O28 <sup>(ii)</sup> | 0.88      | 2.04            | 2.8855(19)      | 159.8             |
| <b>0.55GPa</b>                        |           |                 |                 |                   |
| O16—H161 $\cdots$ O17 <sup>(i)</sup>  | 0.82      | 1.86            | 2.639(9)        | 158.2             |
| N26—H261 $\cdots$ O28 <sup>(ii)</sup> | 0.86      | 2.04            | 2.860(10)       | 159.4             |
| <b>1.66GPa</b>                        |           |                 |                 |                   |
| O16—H161 $\cdots$ O17 <sup>(i)</sup>  | 0.82      | 1.79            | 2.609(16)       | 173.2             |
| N26—H261 $\cdots$ O28 <sup>(ii)</sup> | 0.86      | 1.96            | 2.796(13)       | 162.7             |
| <b>3.33GPa</b>                        |           |                 |                 |                   |
| O16—H161 $\cdots$ O17 <sup>(i)</sup>  | 0.82      | 1.73            | 2.543(10)       | 172.4             |
| N26—H261 $\cdots$ O28 <sup>(ii)</sup> | 0.86      | 1.89            | 2.725(13)       | 161.9             |
| <b>4.06GPa</b>                        |           |                 |                 |                   |
| O16—H161 $\cdots$ O17 <sup>(i)</sup>  | 0.82      | 1.73            | 2.527(10)       | 172.8             |
| N26—H261 $\cdots$ O28 <sup>(ii)</sup> | 0.86      | 1.87            | 2.708(9)        | 160.2             |
| <b>4.34GPa</b>                        |           |                 |                 |                   |
| O16—H161 $\cdots$ O17 <sup>(i)</sup>  | 0.82      | 1.7             | 2.514(11)       | 172.2             |
| N26—H261 $\cdots$ O28 <sup>(ii)</sup> | 0.86      | 1.85            | 2.685(11)       | 162.0             |
| <b>5.06GPa</b>                        |           |                 |                 |                   |
| O16—H161 $\cdots$ O17 <sup>(i)</sup>  | 0.82      | 1.68            | 2.496(12)       | 170.4             |
| N26—H261 $\cdots$ O28 <sup>(ii)</sup> | 0.86      | 1.82            | 2.655(12)       | 159.0             |

Symmetry code(s): (i)  $-x-1, -y+2, -z+2$ ; (ii)  $-x+1, -y+1, -z$ ; (iii)  $-x, -y+2, -z+1$ ; (iv)  $-x+2, -y+1, -z+1$ .
